# Supplementary material
Source: PubMed Central journal article supplement (PMC2937920)

Supplementary Figure 1

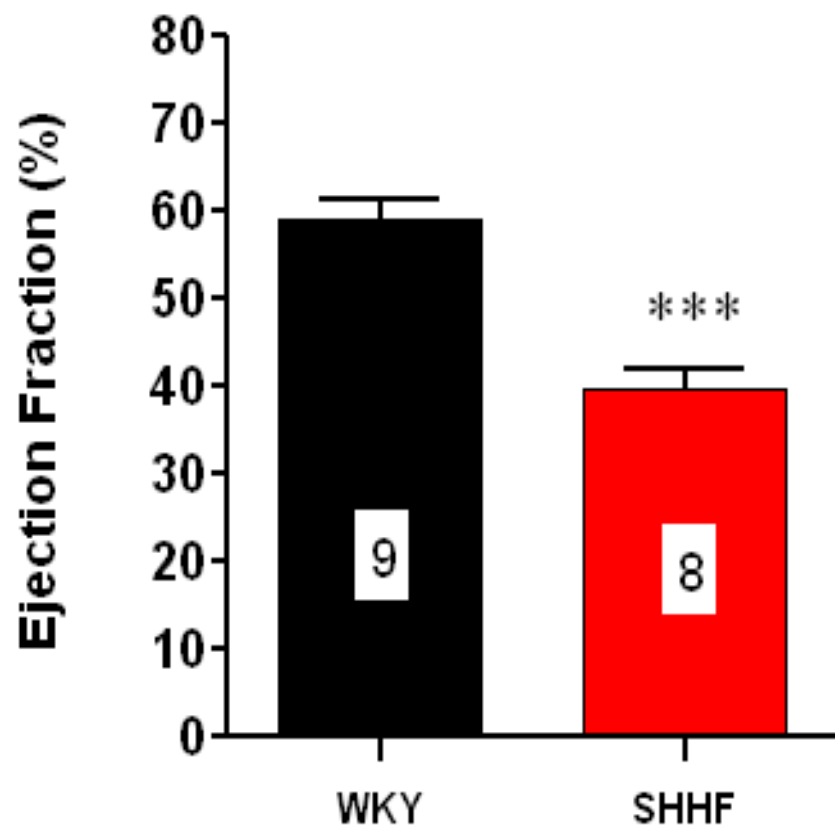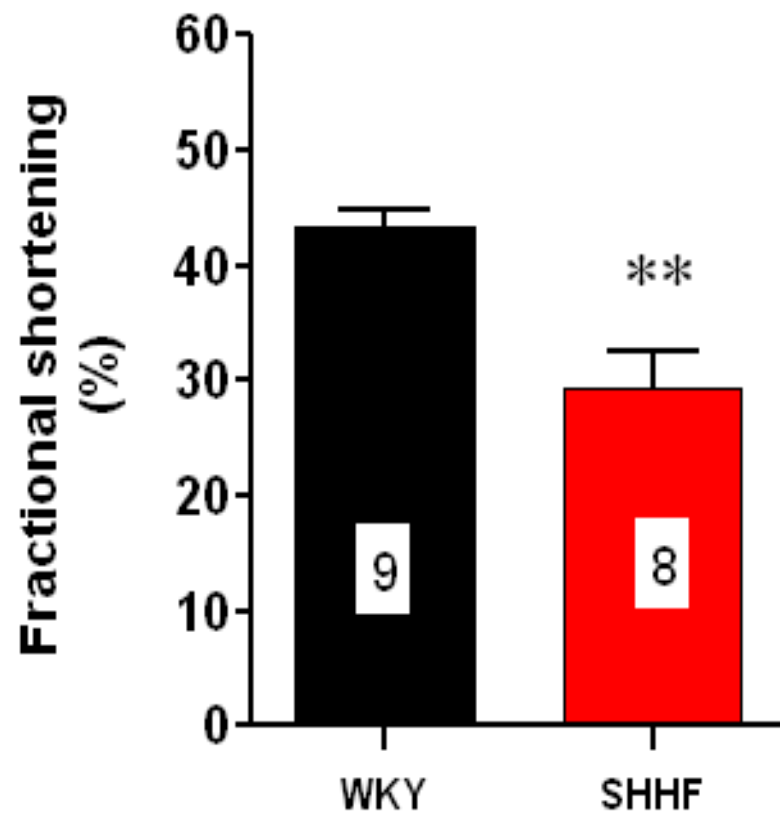

**Supplementary  
Figure 2**

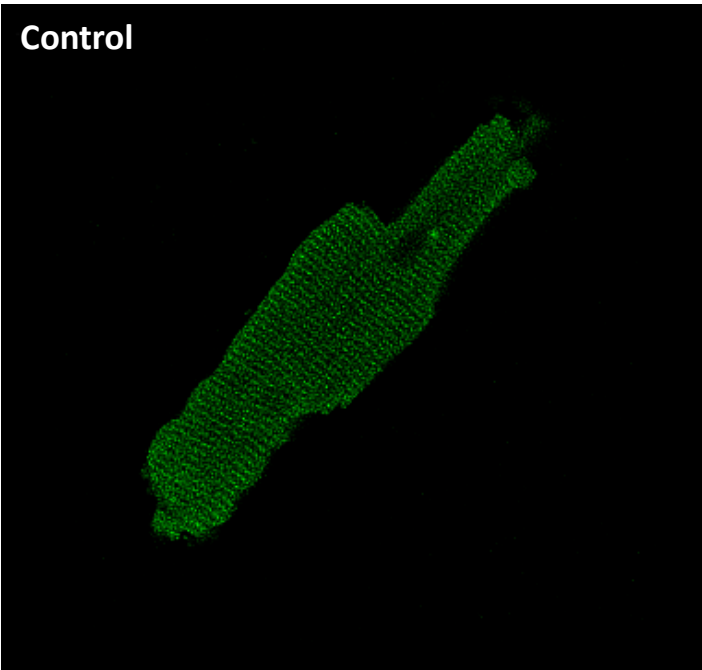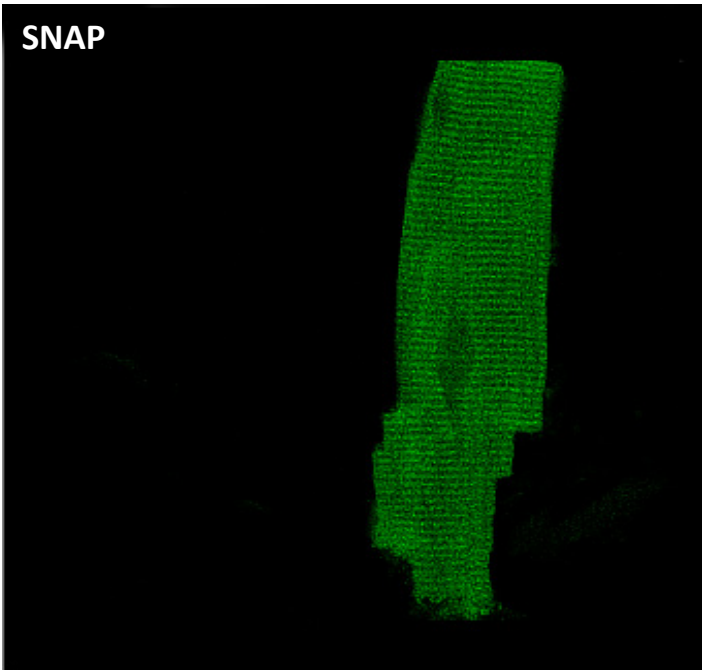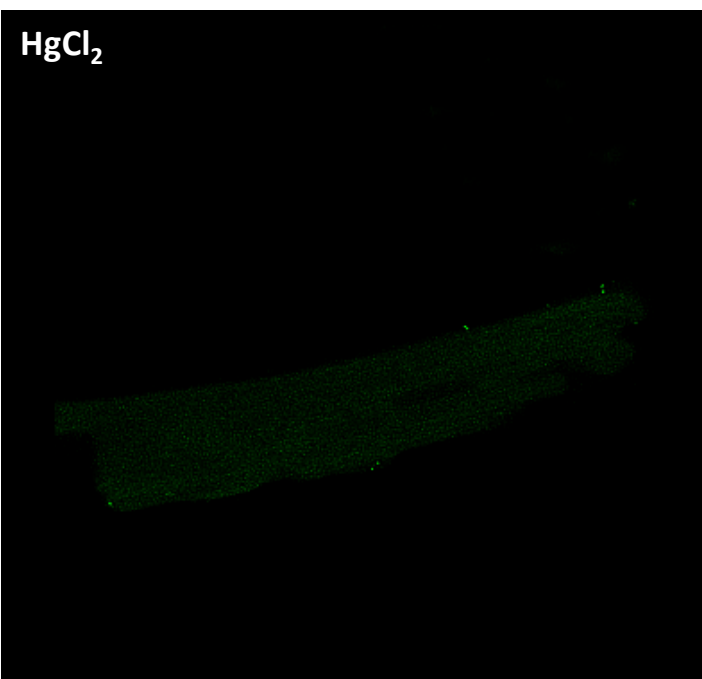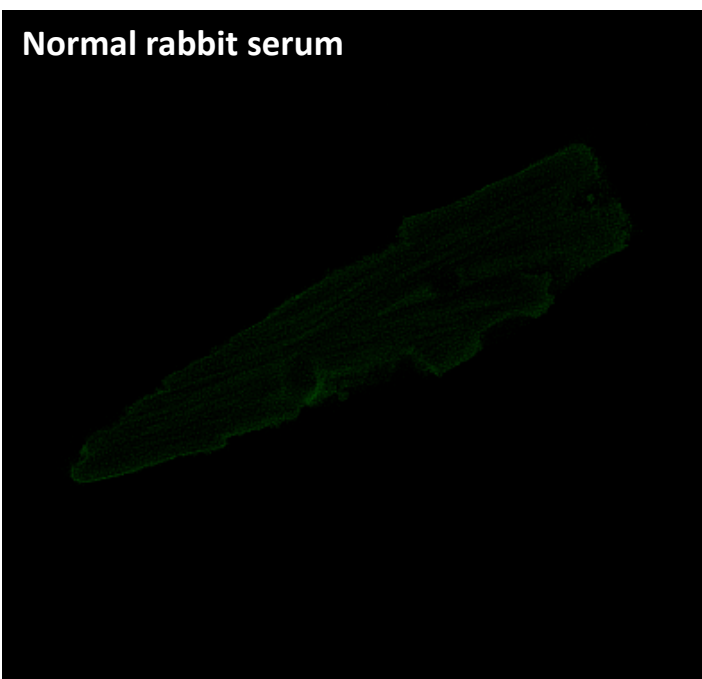

Supplement: supp_M110.154948_jbc.M110.154948-2.pdf [file supp_M110.154948_jbc.M110.154948-2.pdf]
